# Supplementary material for: Prioritization of cancer therapeutic targets using CRISPR–Cas9 screens
Source: Springer Nature journal article supplement (doi:10.1038/s41586-019-1103-9), 2019-04-10

ED Fig 8c (B-tubulin & WRN were run on the same gel)

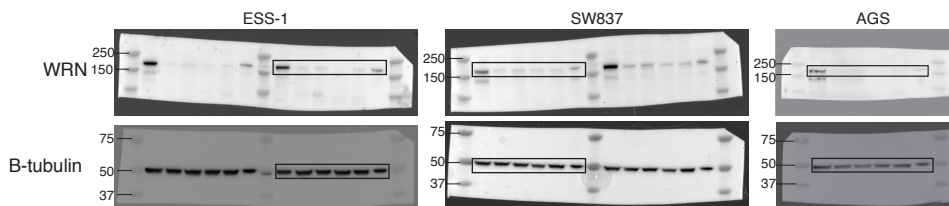

ED Fig 8f (B-tubulin & WRN were run on the same gel)

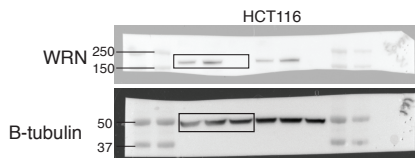

ED Fig 9b (B-tubulin, MLH1 & WRN were run on the same gel)

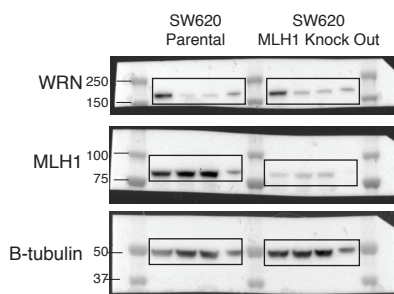

ED Fig 9c (MSH3, MLH1 and B-tubulin were run on separate gels)

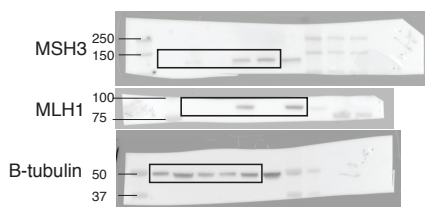

ED Fig 9f (B-tubulin & WRN were run on the same gel)

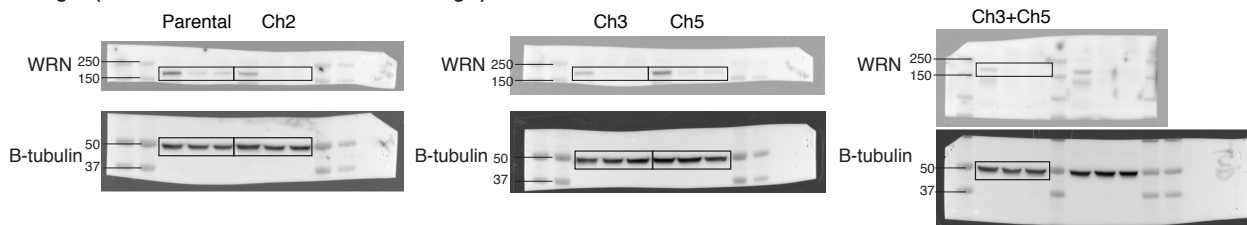

ED Fig 10c (Actin & Flag were run on the same gel)

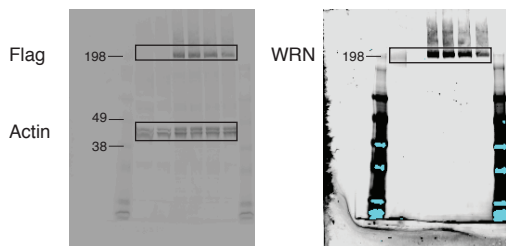

ED Fig 10c (B-tubulin & WRN were run on the same gel)

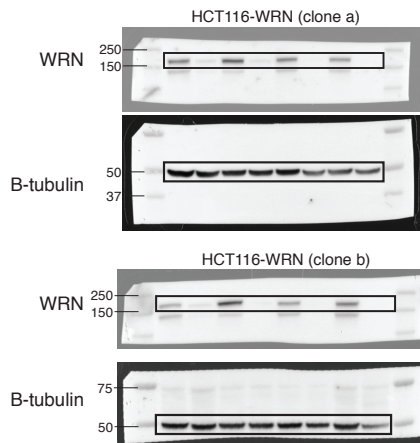

Supplement: 41586_2019_1103_MOESM3_ESM.pdf [file 41586_2019_1103_MOESM3_ESM.pdf]
